# Supplementary material
Source: Springer Nature journal article supplement (https://www.springermedizin.de/resource/supplementary/12935_2010_255_MOESM5_ESM.pdf/9540156)
Supplement: MOESM5 [file 9540156]

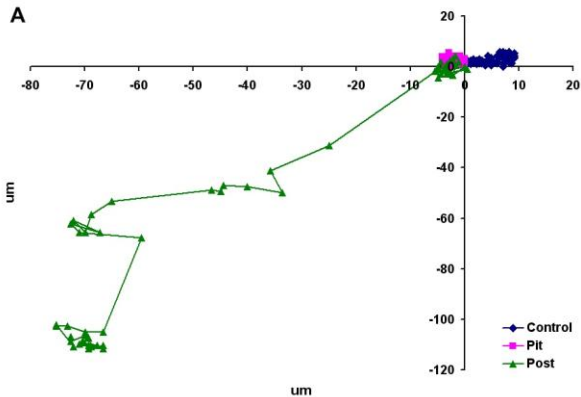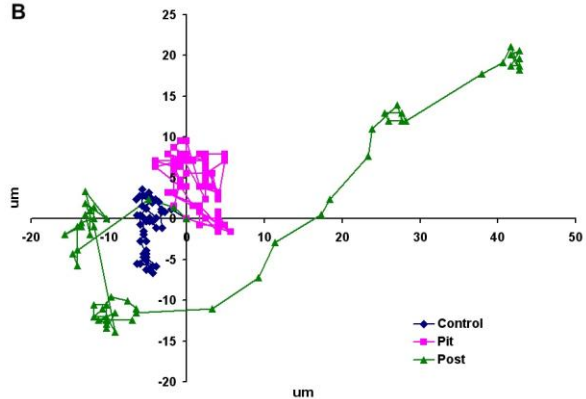

**C**

|             |         | Directed Diffusion                  |                                       |               | Confined Diffusion                      |                             |               |
|-------------|---------|-------------------------------------|---------------------------------------|---------------|-----------------------------------------|-----------------------------|---------------|
|             |         | $v$<br>[ $\mu\text{m}/\text{min}$ ] | $D$<br>[ $\mu\text{m}^2/\text{min}$ ] | %<br>Directed | $D_M$<br>[ $\mu\text{m}^2/\text{min}$ ] | $\Lambda$ [ $\mu\text{m}$ ] | %<br>Confined |
| Standard    | Control | N/A                                 | N/A                                   | 0.0           | 0.032<br>( $\pm 0.005$ )                | 3.53*<br>( $\pm 0.142$ )    | 100.0         |
|             | Pit     | N/A                                 | N/A                                   | 0.0           | 0.069<br>( $\pm 0.006$ )                | 2.656**<br>( $\pm 0.156$ )  | 100.0         |
|             | Post    | 0.501**<br>( $\pm 0.085$ )          | 0.957<br>( $\pm 0.422$ )              | 11.1          | 0.365*<br>( $\pm 0.040$ )               | 4.559*<br>( $\pm 0.318$ )   | 88.9          |
| Transfected | Control | 0.029<br>( $\pm 0.009$ )            | 0.028<br>( $\pm 0.008$ )              | 16.7          | 0.031<br>( $\pm 0.004$ )                | 1.286*<br>( $\pm 0.120$ )   | 83.3          |
|             | Pit     | 0.016<br>( $\pm 0.005$ )            | 0.143<br>( $\pm 0.011$ )              | 5.0           | 0.079<br>( $\pm 0.046$ )                | 3.571**<br>( $\pm 0.545$ )  | 95.0          |
|             | Post    | 0.211**<br>( $\pm 0.064$ )          | 0.959<br>( $\pm 0.542$ )              | 14.8          | 0.051*<br>( $\pm 0.009$ )               | 2.500*<br>( $\pm 0.217$ )   | 85.2          |
